# Supplementary material for: Exacerbation of Fatality Rates Induced by Poor Air Quality Due to Open-Air Mass Funeral Pyre Cremation during the Second Wave of COVID-19
Source: MDPI journal article supplement (doi:10.3390/toxics10060306), 2022-06-06
Supplement: s1 [file s1]

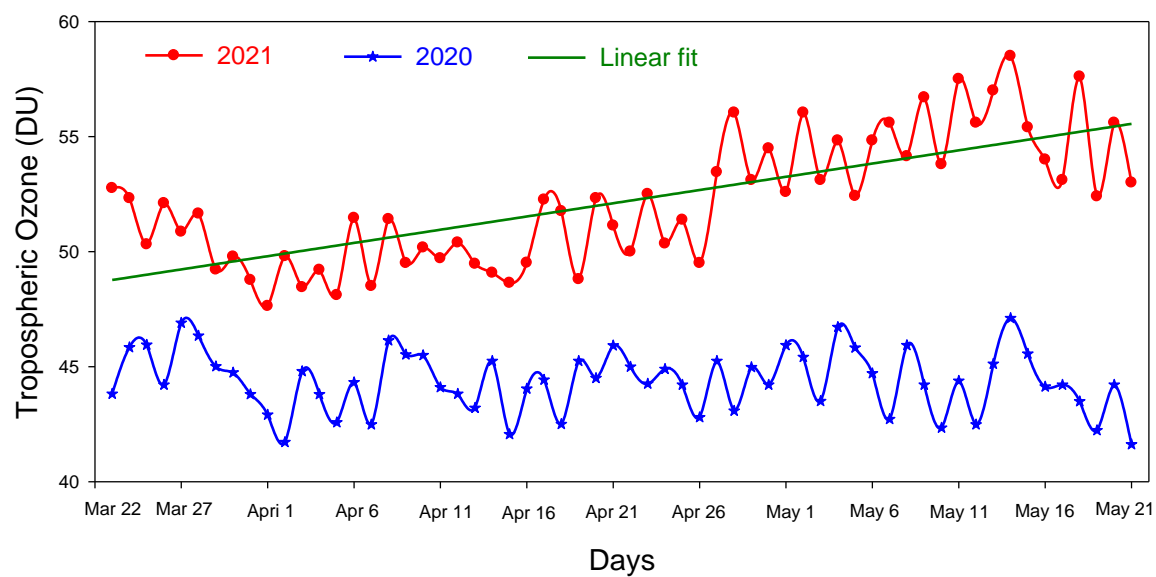

**Figure S2.** Daily variation of the tropospheric column ozone data (AURA-OMI) during the lock-down periods in 2020 and 2021. (The tropospheric ozone is calculated by subtracting stratospheric column ozone from the total column ozone data).
